# Supplementary material
Source: Springer Nature journal article supplement (https://www.springermedizin.de/resource/supplementary/13058_2012_3042_MOESM1_ESM.pdf/9703126)

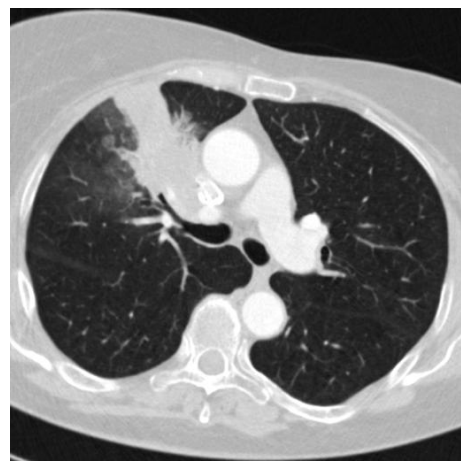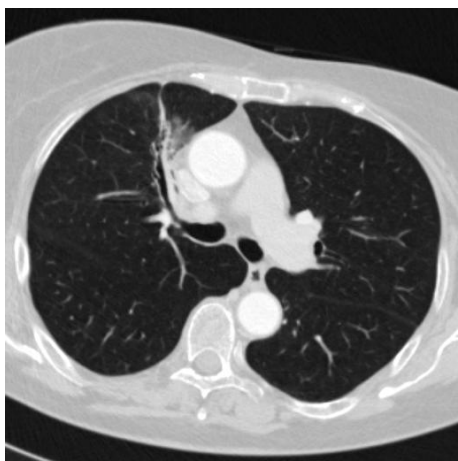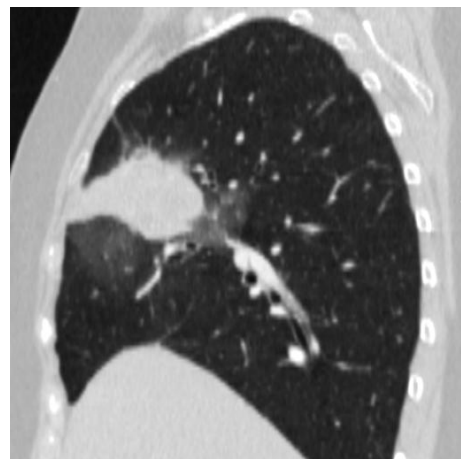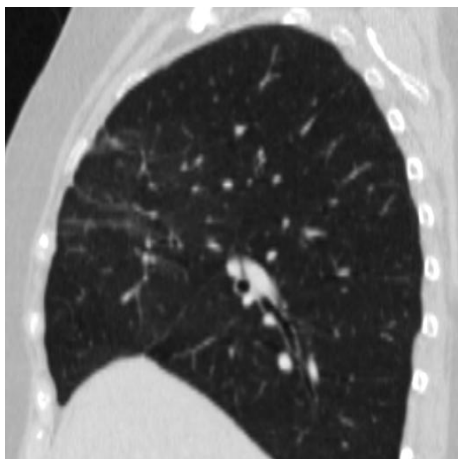

Supplement: MOESM1 [file 9703126]
